# Supplementary material
Source: PubMed Central journal article supplement (PMC7315384)
Supplement: jamasurg-155-742-s001.pdf [file jamasurg-155-742-s001.pdf]

## Supplementary Online Content

Johnson HM, Irish W, Strassle PD, et al. Associations between career satisfaction, personal life factors, and work-life integration practices among US surgeons by gender. *JAMA Surg*. Published online June 24, 2020. doi:10.1001/jamasurg.2020.1332

**eTable 1.** Household and childcare responsibilities, by gender

**eTable 2.** Multivariable analysis of professional and personal factors associated with degree of career satisfaction among surgeons with children, by gender

This supplementary material has been provided by the authors to give readers additional information about their work.

**eTable 1.** Household and childcare responsibilities, by gender<sup>a</sup>

| Characteristic                                    | Men       | Women    | P value |
|---------------------------------------------------|-----------|----------|---------|
| <b>Household chores</b>                           |           |          |         |
| <b>Primarily responsible for meal preparation</b> |           |          | <.001   |
| Yourself                                          | 355 (12)  | 282 (46) |         |
| Partner                                           | 1438 (47) | 115 (19) |         |
| Shared                                            | 1139 (37) | 178 (29) |         |
| Outsourced                                        | 114 (4)   | 44 (7)   |         |
| <b>Primarily responsible for housekeeping</b>     |           |          | <.001   |
| Yourself                                          | 161 (5)   | 149 (24) |         |
| Partner                                           | 1050 (34) | 33 (5)   |         |
| Shared                                            | 794 (26)  | 96 (15)  |         |
| Outsourced                                        | 1041 (34) | 341 (55) |         |
| <b>Primarily responsible for yardwork</b>         |           |          | <.001   |
| Yourself                                          | 786 (27)  | 65 (12)  |         |
| Partner                                           | 108 (4)   | 132 (24) |         |
| Shared                                            | 496 (17)  | 68 (12)  |         |
| Outsourced                                        | 1485 (52) | 294 (53) |         |
| <b>Childcare<sup>b</sup></b>                      |           |          |         |
| <b>Type of childcare outside school</b>           |           |          | <.001   |
| My home                                           | 2093 (74) | 274 (65) |         |
| Day care                                          | 369 (13)  | 86 (20)  |         |
| Pre- or post-school care                          | 203 (7)   | 35 (8)   |         |
| Other                                             | 173 (6)   | 28 (7)   |         |
| <b>Primary childcare provider</b>                 |           |          | <.001   |
| Spouse/partner                                    | 1945 (69) | 86 (20)  |         |
| Employed person                                   | 718 (25)  | 289 (68) |         |
| Family/friend                                     | 87 (3)    | 28 (7)   |         |
| Other                                             | 89 (3)    | 21 (5)   |         |

<sup>a</sup> Data are presented as scaled weighted frequencies and percent of responses for each survey item, owing to differential response rates for each item.

<sup>b</sup> Among respondents with children only

**eTable 2.** Multivariable analysis of professional and personal factors associated with degree of career satisfaction among surgeons with children, by gender

| Characteristic                                                    | Men              |         | Women            |         |
|-------------------------------------------------------------------|------------------|---------|------------------|---------|
|                                                                   | OR (95% CI)      | P value | OR (95% CI)      | P value |
| Age (per year increase)                                           | 1.04 (1.03-1.06) | <.001   | 1.03 (0.99-1.06) | .11     |
| Hours work/week (per unit increase)                               | 1.00 (1.00-1.01) | .44     | 1.01 (0.99-1.02) | .48     |
| <i>Practice type</i>                                              |                  |         |                  |         |
| Academic                                                          | 1.00 (ref)       | –       | 1.00 (ref)       | –       |
| Private                                                           | 0.53 (0.41-0.70) | <.001   | 0.56 (0.33-0.95) | .03     |
| Neither                                                           | 0.46 (0.33-0.65) | <.001   | 0.57 (0.31-1.04) | .07     |
| Practice location: Rural vs Urban                                 | 1.10 (0.74-1.64) | .64     | 1.19 (0.49-2.92) | .70     |
| Subspecialty vs General Surgery                                   | 1.20 (0.93-1.55) | .15     | 1.14 (0.67-1.93) | .63     |
| Lives with spouse/partner: Yes <sup>a</sup> vs No                 | 1.13 (0.67-1.91) | .66     | 1.31 (0.67-2.59) | .43     |
| Primarily responsible for at least one household chore: Yes vs No | 0.84 (0.65-1.07) | .16     | 0.74 (0.45-1.23) | .24     |
| <i>Interruption of personal life due to work is a problem</i>     |                  |         |                  |         |
| Strongly agree/Agree                                              | 0.51 (0.38-0.69) | <.001   | 0.54 (0.29-1.00) | .05     |
| Neutral                                                           | 1.00 (ref)       | –       | 1.00 (ref)       | –       |
| Strongly disagree/disagree                                        | 1.49 (1.01-2.21) | .045    | 1.13 (0.48-2.64) | .78     |
| <i>Work schedule leaves enough time for family life</i>           |                  |         |                  |         |
| Strongly agree/Agree                                              | 1.46 (1.03-2.05) | .03     | 1.08 (0.48-2.47) | .89     |
| Neutral                                                           | 1.00 (ref)       | –       | 1.00 (ref)       | –       |
| Strongly disagree/disagree                                        | 0.70 (0.52-0.95) | .02     | 0.45 (0.23-0.87) | .02     |
| 3 or more children: Yes vs No                                     | 0.89 (0.71-1.11) | .30     | 1.31 (0.76-2.25) | .32     |
| <i>Spouse/partner occupation</i>                                  |                  |         |                  |         |
| Physician/surgeon                                                 | 1.14 (0.78-1.68) | .50     | 1.66 (0.75-3.67) | .22     |
| Other occupation                                                  | 1.18 (0.90-1.55) | .23     | 1.39 (0.69-2.83) | .36     |
| Homemaker                                                         | 1.00 (ref)       | –       | 1.00 (ref)       | –       |
| <i>Primary childcare provider</i>                                 |                  |         |                  |         |
| Spouse/partner                                                    | 1.00 (ref)       | –       | 1.00 (ref)       | –       |
| Employed person                                                   | 0.87 (0.64-1.19) | .39     | 1.43 (0.74-2.78) | .29     |
| Family/friend                                                     | 0.62 (0.34-1.13) | .12     | 1.55 (0.51-4.75) | .44     |
| Other                                                             | 0.77 (0.38-1.57) | .48     | 0.65 (0.20-2.09) | .47     |
| <i>Satisfied with childcare arrangement</i>                       |                  |         |                  |         |
| Strongly agree/Agree                                              | 1.12 (0.82-1.54) | .48     | 1.70 (1.00-2.91) | .051    |
| Neutral                                                           | 1.00 (ref)       | –       | 1.00 (ref)       | –       |
| Strongly disagree/disagree                                        | 0.61 (0.41-0.91) | .01     | 0.92 (0.46-1.85) | .82     |
| <i>Satisfied with division of parenting responsibilities</i>      |                  |         |                  |         |
| Strongly agree/Agree                                              | 1.73 (1.26-2.36) | .001    | 1.68 (0.93-3.04) | .08     |
| Neutral                                                           | 1.00 (ref)       | –       | 1.00 (ref)       | –       |
| Strongly disagree/disagree                                        | 1.10 (0.75-1.60) | .62     | 1.03 (0.57-1.89) | .92     |

Abbreviations: OR=odds ratio, CI=confidence interval, ref=reference

<sup>a</sup> With or without children
